# Supplementary material for: Cold Sintering of Li6.4La3Zr1.4Ta0.6O12/PEO Composite Solid Electrolytes
Source: MDPI journal article supplement (doi:10.3390/molecules27196756), 2022-10-10
Supplement: s1 [file s1]

*Supplementary materials*

# Cold Sintering of $\text{Li}_{6.4}\text{La}_3\text{Zr}_{1.4}\text{Ta}_{0.6}\text{O}_{12}$ /PEO Composite Solid Electrolytes

Binlang He <sup>1</sup>, Shenglin Kang <sup>1</sup>, Xuotong Zhao <sup>1,\*</sup>, Jiexin Zhang <sup>1</sup>, Xilin Wang <sup>2</sup>, Yang Yang <sup>1</sup>, Lijun Yang <sup>1</sup> and Ruijin Liao <sup>1</sup>

<sup>1</sup> State Key Laboratory of Power Transmission Equipment & System Security and New Technology, Chongqing University, Chongqing 400044, China

<sup>2</sup> Tsinghua Shenzhen International Graduate School, Tsinghua University, Shenzhen 518055, China

\* Correspondence: zxt201314@cqu.edu.cn

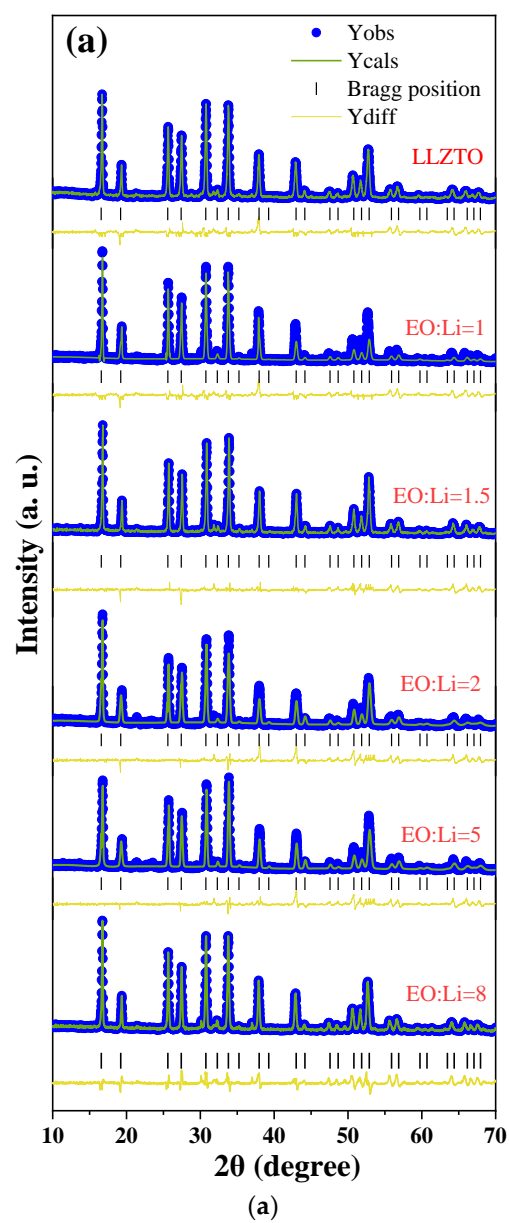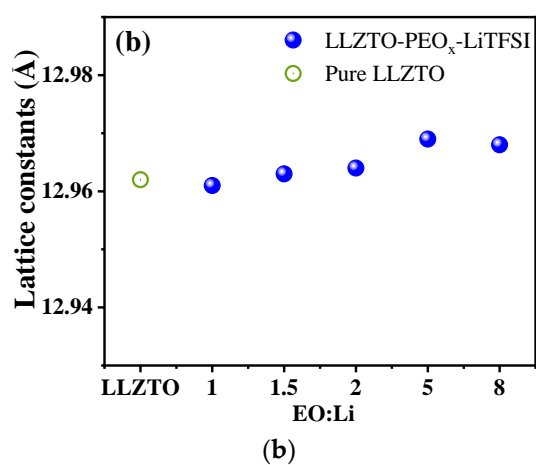

**Figure S1.** (a) Rietveld refinement results of XRD patterns for LLZTO-PEO<sub>x</sub>-LiTFSI, (b) Lattice constants of the cold-sintered LLZTO composite electrolytes.

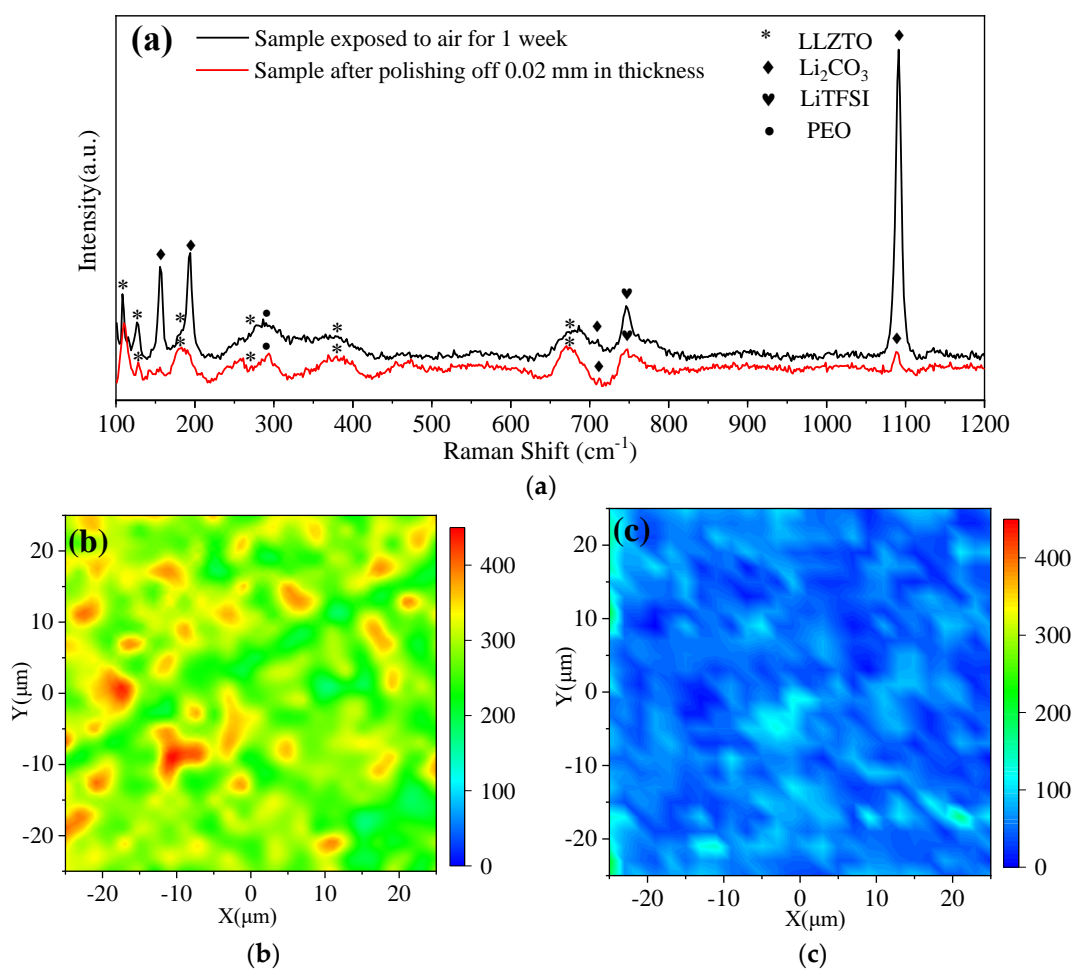

**Figure S2.** (a) Typical Raman spectra of the air-exposed LLZTO-PEO<sub>2</sub>-LiTFSI sample before and after being polished, Raman mapping images of the (b) air-exposed LLZTO-PEO<sub>2</sub>-LiTFSI before being polished and (c) after being polished.
